# Supplementary material for: Sensory Drivers of Dental Phobia in the older adults: A Cross-age Study Based on an Integrated Kano-IPA Model
Source: Research Square preprint supplement (doi:10.21203/rs.3.rs-7695253/v1), 2025-10-21
Supplement: Supplementary file 1 [file 61f796c176b8812948bf9927.docx]

A questionnaire on the sensory drivers of dental fear in the elderly

Dear respondent, hello! This is a survey questionnaire on the sensory drivers of dental fear among older adults. It aims to explore elderly patients' satisfaction and needs regarding various sensory stimuli within the dental clinic environment. Your responses are crucial to this study, so please answer truthfully based on your specific circumstances. Researchers will strictly adhere to academic ethics and will only use your responses as a reference for academic research and will not disclose them for any other purpose. Thank you very much for your participation! Have a great time!

Section 1:

Background Information

1. Your Gender:

□Man □Woman

2、Your age:

□60-69 □70-79 □80 years and above

Please fill in your exact age:___________

3. Your oral condition (multiple choices allowed):

□ Basically normal □ Missing teeth □ Existing dental diseases such as periodontal disease and caries

4. Number of visits:

□1-5 times □6-10 times □10 times or more

5. Previous experience with the doctor:

□ Mainly negative emotions such as fear, dread, and anxiety □ Mainly positive emotions such as peace of mind, relaxation, and comfort □ Neutral or no feeling

Part II:

Importance evaluation section

VP1 Color Factor Regarding the visual experience of cold colors such as white, gray, and blue in dental hospitals, the degree to which you experience negative emotions such as anxiety, fear, and dread is:

| serious | More serious | generally | Less serious | Nothing serious |
| --- | --- | --- | --- | --- |
| □ | □ | □ | □ | □ |

VP2 Lighting Factor : The degree to which the visual experience of cold LED lighting, strong light environment, etc. in dental hospitals brings you anxiety, fear, and other negative emotions is:

| serious | More serious | generally | Less serious | Nothing serious |
| --- | --- | --- | --- | --- |
| □ | □ | □ | □ | □ |

VP3 Medical Device Factor : How much anxiety, fear, and other negative emotions does the visual experience of medical devices such as needles, dental drills, and pliers bring to you ?

| serious | More serious | generally | Less serious | Nothing serious |
| --- | --- | --- | --- | --- |
| □ | □ | □ | □ | □ |

VP4 Facility Factor : How much anxiety, fear, and other negative emotions do the visual experiences of metal seats, plastic facilities, electronic guides, glass partitions, and other facilities bring to you?

| serious | More serious | generally | Less serious | Nothing serious |
| --- | --- | --- | --- | --- |
| □ | □ | □ | □ | □ |

VP5: How much does the visual perception of medical staff's white coats, masks, and other image elements cause you to experience negative emotions such as anxiety, fear, and dread?

| serious | More serious | generally | Less serious | Nothing serious |
| --- | --- | --- | --- | --- |
| □ | □ | □ | □ | □ |

VP6 Crowd Behavior : How much anxiety, fear, and other negative emotions do visual experiences of other patients receiving treatment, other patients waiting for treatment, and medical staff bring to you?

| serious | More serious | generally | Less serious | Nothing serious |
| --- | --- | --- | --- | --- |
| □ | □ | □ | □ | □ |

AP1 Tool Noise : How much anxiety, fear, or other negative experiences does the noise of drills or other therapeutic equipment cause you?

| serious | More serious | generally | Less serious | Nothing serious |
| --- | --- | --- | --- | --- |
| □ | □ | □ | □ | □ |

AP2: To what extent do the sounds of other patients' conversations and other man-made noises cause you anxiety, fear, or other negative emotions?

| serious | More serious | generally | Less serious | Nothing serious |
| --- | --- | --- | --- | --- |
| □ | □ | □ | □ | □ |

AP3: How much do background sounds like number calling, music, announcements, etc., cause you to feel anxious, fearful, or intimidated?

| serious | More serious | generally | Less serious | Nothing serious |
| --- | --- | --- | --- | --- |
| □ | □ | □ | □ | □ |

AP4: How much do the medical staff's voices , such as their service attitude, tone, and speaking speed, cause you to experience negative emotions like anxiety, fear, and dread?

| serious | More serious | generally | Less serious | Nothing serious |
| --- | --- | --- | --- | --- |
| □ | □ | □ | □ | □ |

OP1: What is the degree to which the smell of disinfectant, therapeutic medicine, etc. causes you anxiety, fear, terror, and other negative emotions?

| serious | More serious | generally | Less serious | Nothing serious |
| --- | --- | --- | --- | --- |
| □ | □ | □ | □ | □ |

OP2 Air circulation : How much do the negative effects of odors, lack of air purification, and other odors in your environment cause you to feel anxious, fearful, or intimidated?

| serious | More serious | generally | Less serious | Nothing serious |
| --- | --- | --- | --- | --- |
| □ | □ | □ | □ | □ |

Regarding the OP3 treatment activities, the degree to which the smell of the odor caused by treatment behaviors such as teeth grinding causes you anxiety, fear, terror, and other negative experiences is:

| serious | More serious | generally | Less serious | Nothing serious |
| --- | --- | --- | --- | --- |
| □ | □ | □ | □ | □ |

the taste sensations of anesthetics, mouthwashes, and other chemicals associated with GP1 cause you to experience negative emotions such as anxiety, fear, and dread?

| serious | More serious | generally | Less serious | Nothing serious |
| --- | --- | --- | --- | --- |
| □ | □ | □ | □ | □ |

the GP2 device affects your anxiety, fear, and other negative experiences caused by the odor of cotton balls, gauze, medical gloves, etc. is:

| serious | More serious | generally | Less serious | Nothing serious |
| --- | --- | --- | --- | --- |
| □ | □ | □ | □ | □ |

GP3 Treatment Behavior Regarding the degree of anxiety, fear, and other negative reactions caused by the taste sensations of blood, burning, etc. during treatment :

| serious | More serious | generally | Less serious | Nothing serious |
| --- | --- | --- | --- | --- |
| □ | □ | □ | □ | □ |

TP1 Instrument Impact The degree to which the foreign body sensation caused by medical devices such as mouth mirrors, probes, and saliva suction tubes causes you anxiety, fear, and other negative reactions is:

| serious | More serious | generally | Less serious | Nothing serious |
| --- | --- | --- | --- | --- |
| □ | □ | □ | □ | □ |

TP2 Treatment Experience : The degree of anxiety, fear, and other negative experiences caused by tactile discomfort such as the pain of anesthesia and the soreness of the dental drill is:

| serious | More serious | generally | Less serious | Nothing serious |
| --- | --- | --- | --- | --- |
| □ | □ | □ | □ | □ |

TP3 Facility Experience What is the degree to which the discomfort of dental chairs, seats and other facilities causes you anxiety, fear, terror and other negative emotions?

| serious | More serious | generally | Less serious | Nothing serious |
| --- | --- | --- | --- | --- |
| □ | □ | □ | □ | □ |

TP4 Proprioception Regarding the degree of negative effects such as anxiety, fear, and dread caused by muscle soreness and muscle tightening due to tension caused by keeping your mouth open for too long during treatment, what is the degree of negative effects such as anxiety, fear, and dread caused by this discomfort?

| serious | More serious | generally | Less serious | Nothing serious |
| --- | --- | --- | --- | --- |
| □ | □ | □ | □ | □ |

Part III:

Satisfaction evaluation section

VP1 Color Factor: Regarding the visual experience of cool colors such as white, gray, and blue in dental hospitals, how satisfied are you?

| satisfy | Quite satisfied | generally | Rather dissatisfied | Dissatisfied |
| --- | --- | --- | --- | --- |
| □ | □ | □ | □ | □ |

VP2 Lighting Factor: Regarding the visual experience of LED cool-color lighting and strong light environment in dental hospitals , how satisfied are you?

| satisfy | Quite satisfied | generally | Rather dissatisfied | Dissatisfied |
| --- | --- | --- | --- | --- |
| □ | □ | □ | □ | □ |

VP3 Medical Device Factor: Regarding the visual experience of medical devices such as needles, dental drills, and pliers , how would you rate your satisfaction?

| satisfy | Quite satisfied | generally | Rather dissatisfied | Dissatisfied |
| --- | --- | --- | --- | --- |
| □ | □ | □ | □ | □ |

VP4 Facility Factor: Regarding the visual experience of facilities such as metal seats, plastic facilities, electronic guides, and glass partitions , how would you rate your satisfaction?

| satisfy | Quite satisfied | generally | Rather dissatisfied | Dissatisfied |
| --- | --- | --- | --- | --- |
| □ | □ | □ | □ | □ |

VP5 Medical Staff Image Regarding the visual perception of medical staff's white coats, masks and other image elements , your satisfaction rating is:

| satisfy | Quite satisfied | generally | Rather dissatisfied | Dissatisfied |
| --- | --- | --- | --- | --- |
| □ | □ | □ | □ | □ |

VP6 Crowd Behavior: Regarding the visual experience of other patients receiving treatment, the behavior of other patients waiting for treatment, and the activities of medical staff , how satisfied are you?

| satisfy | Quite satisfied | generally | Rather dissatisfied | Dissatisfied |
| --- | --- | --- | --- | --- |
| □ | □ | □ | □ | □ |

AP1 Tool Noise Regarding the sound produced by the drill or other treatment equipment , how satisfied are you?

| satisfy | Quite satisfied | generally | Rather dissatisfied | Dissatisfied |
| --- | --- | --- | --- | --- |
| □ | □ | □ | □ | □ |

AP2: Man-made noise. Regarding the sounds produced by other patients' conversations , how satisfied are you?

| satisfy | Quite satisfied | generally | Rather dissatisfied | Dissatisfied |
| --- | --- | --- | --- | --- |
| □ | □ | □ | □ | □ |

AP3 Background Sound Regarding the ambient sounds such as number calling, music in the hospital, and announcements , how satisfied are you?

| satisfy | Quite satisfied | generally | Rather dissatisfied | Dissatisfied |
| --- | --- | --- | --- | --- |
| □ | □ | □ | □ | □ |

AP4 Medical Staff Voice Regarding the medical staff's service attitude, tone, speaking speed and other voices , how satisfied are you?

| satisfy | Quite satisfied | generally | Rather dissatisfied | Dissatisfied |
| --- | --- | --- | --- | --- |
| □ | □ | □ | □ | □ |

OP1 Drug Odor Regarding the odor of disinfectant, therapeutic drugs, etc. , how satisfied are you?

| satisfy | Quite satisfied | generally | Rather dissatisfied | Dissatisfied |
| --- | --- | --- | --- | --- |
| □ | □ | □ | □ | □ |

OP2 Air circulation Regarding the odor in the environment, lack of air purification effect and other odors , your satisfaction rating is:

| satisfy | Quite satisfied | generally | Rather dissatisfied | Dissatisfied |
| --- | --- | --- | --- | --- |
| □ | □ | □ | □ | □ |

Regarding the olfactory experience of OP3 treatment activities such as teeth grinding , how satisfied are you?

| satisfy | Quite satisfied | generally | Rather dissatisfied | Dissatisfied |
| --- | --- | --- | --- | --- |
| □ | □ | □ | □ | □ |

Regarding the taste experience of anesthetics, mouthwashes, and other drugs brought by GP1 Chemicals , how satisfied are you?

| satisfy | Quite satisfied | generally | Rather dissatisfied | Dissatisfied |
| --- | --- | --- | --- | --- |
| □ | □ | □ | □ | □ |

GP2 instruments affect the odor of cotton balls, gauze, medical gloves, etc. , your satisfaction rating is:

| satisfy | Quite satisfied | generally | Rather dissatisfied | Dissatisfied |
| --- | --- | --- | --- | --- |
| □ | □ | □ | □ | □ |

GP3 Treatment Behavior Regarding the taste sensations such as bloody smell and burning sensation during treatment , how satisfied are you?

| satisfy | Quite satisfied | generally | Rather dissatisfied | Dissatisfied |
| --- | --- | --- | --- | --- |
| □ | □ | □ | □ | □ |

TP1 Instrument Impact Regarding the foreign body sensation caused by medical devices such as mouth mirrors, probes, and saliva suction tubes , how would you rate your satisfaction?

| satisfy | Quite satisfied | generally | Rather dissatisfied | Dissatisfied |
| --- | --- | --- | --- | --- |
| □ | □ | □ | □ | □ |

TP2 Treatment Experience Regarding the pain of anesthesia, soreness from the dental drill, and other tactile discomfort , how satisfied are you?

| satisfy | Quite satisfied | generally | Rather dissatisfied | Dissatisfied |
| --- | --- | --- | --- | --- |
| □ | □ | □ | □ | □ |

TP3 Facility Experience Regarding the discomfort you feel with dental chairs, seats and other facilities , how satisfied are you?

| satisfy | Quite satisfied | generally | Rather dissatisfied | Dissatisfied |
| --- | --- | --- | --- | --- |
| □ | □ | □ | □ | □ |

TP4 Proprioception Regarding discomfort such as muscle soreness caused by keeping your mouth open for too long during treatment and muscle tightness caused by tension , how would you rate your satisfaction?

| satisfy | Quite satisfied | generally | Rather dissatisfied | Dissatisfied |
| --- | --- | --- | --- | --- |
| □ | □ | □ | □ | □ |
